# Supplementary material
Source: PubMed Central journal article supplement (PMC4986630)

# Fig.1

## A

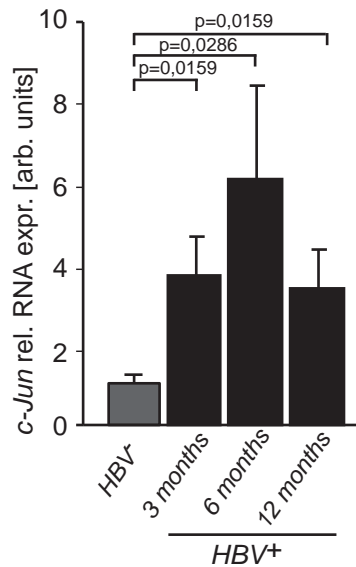

## B

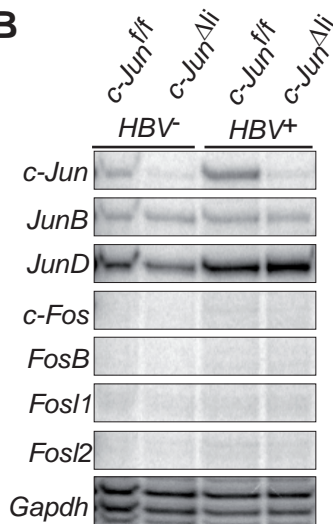

## C

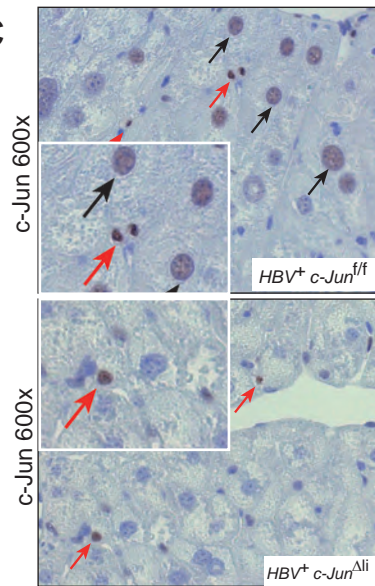



# Fig. 3

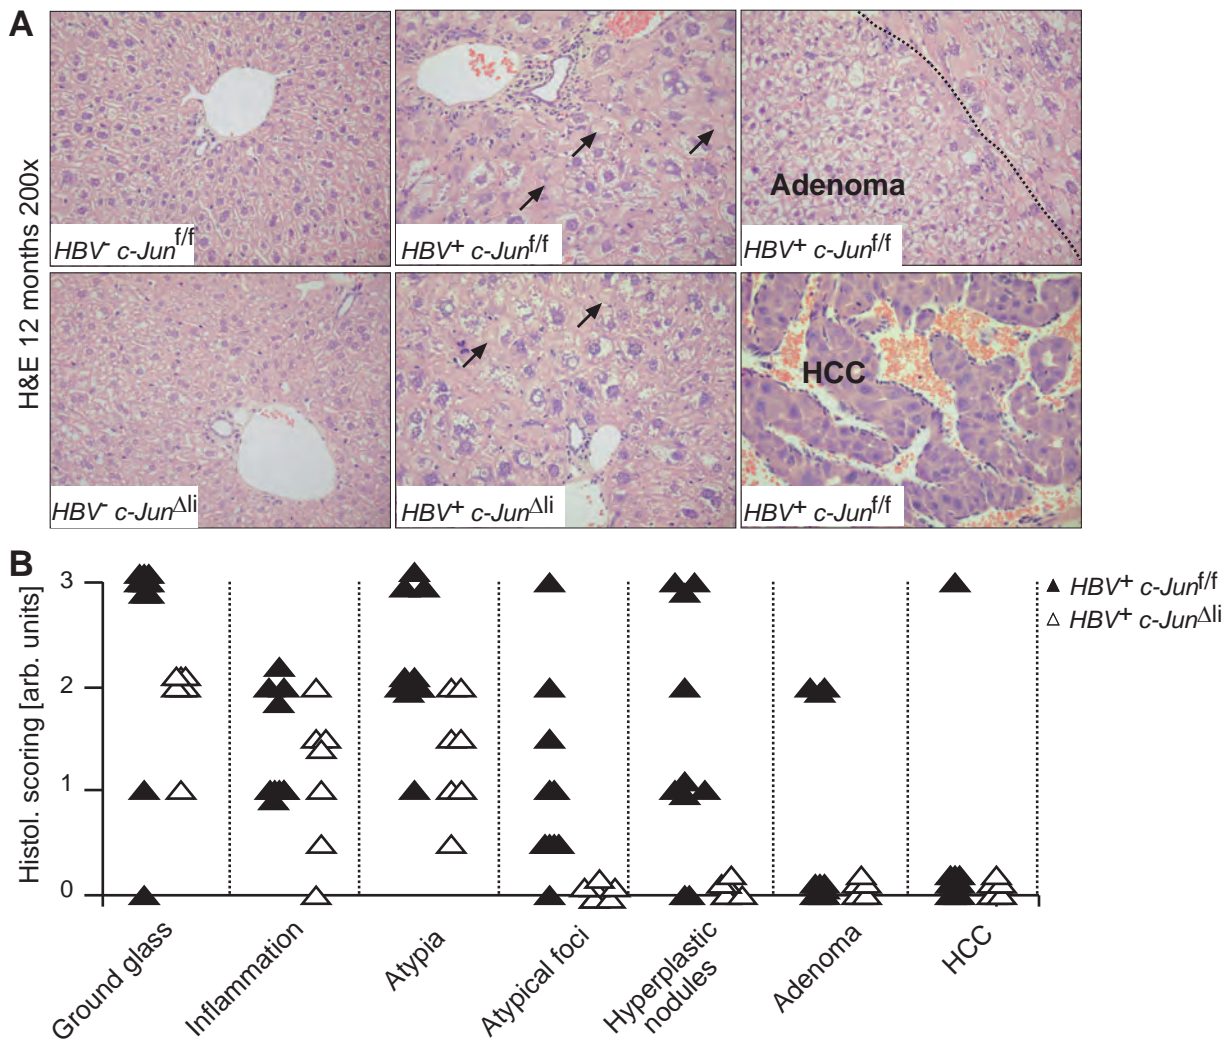

# Fig.4

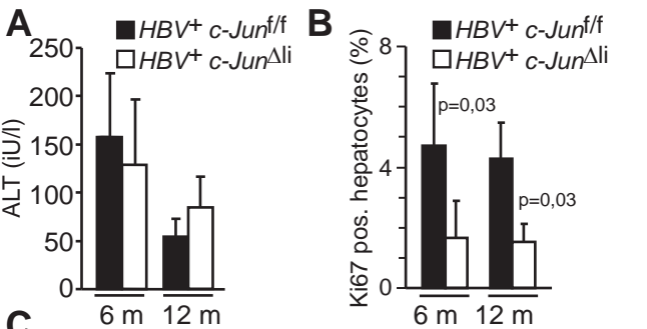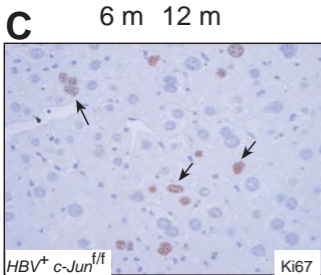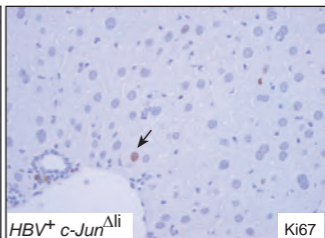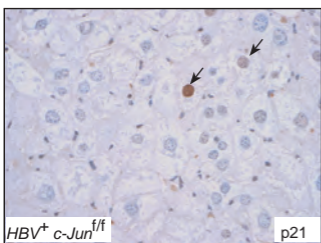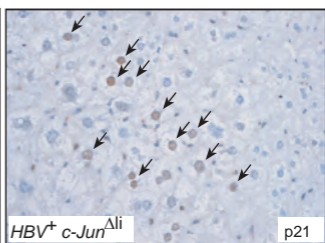

# Fig.5

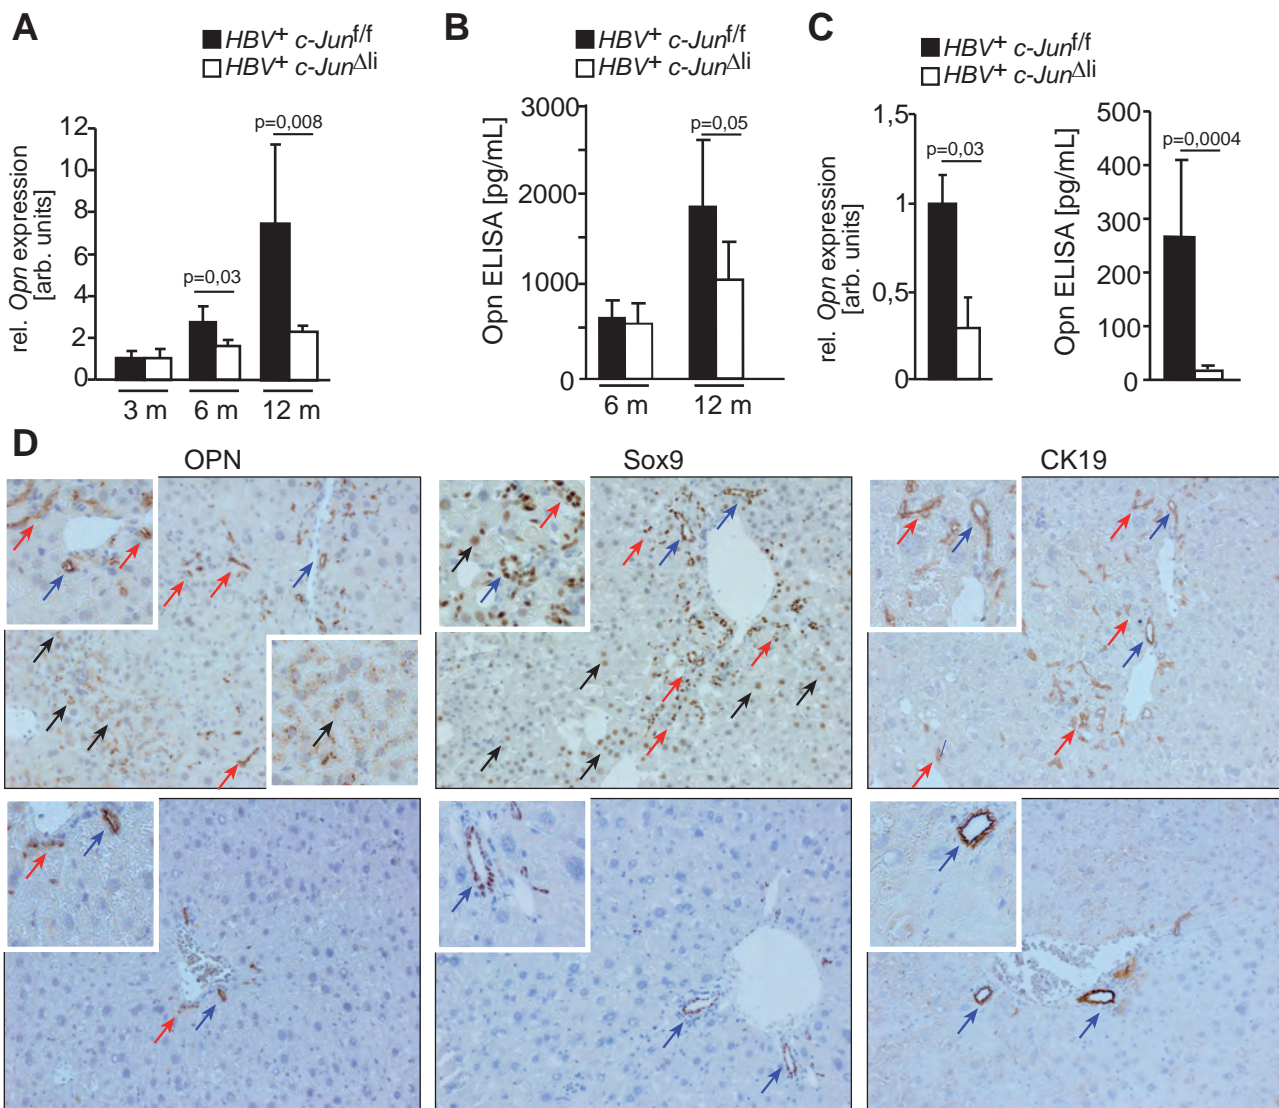

# Suppl. Fig. S1

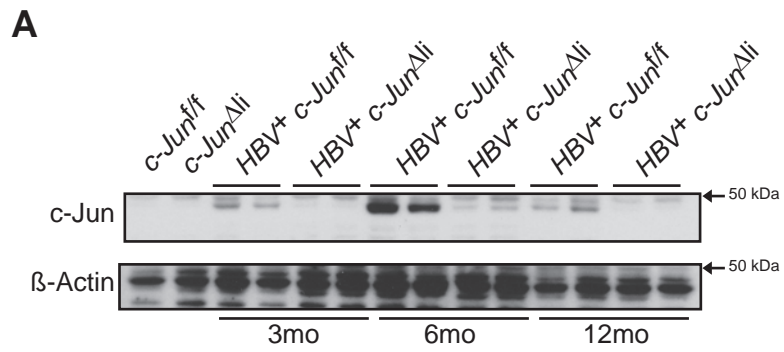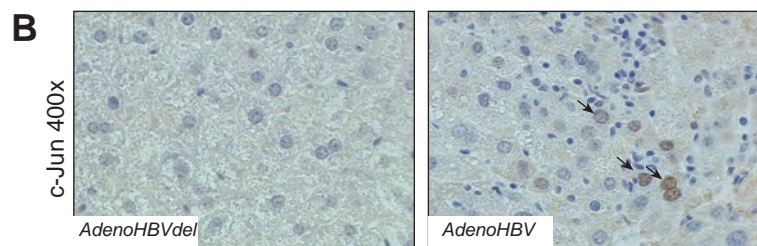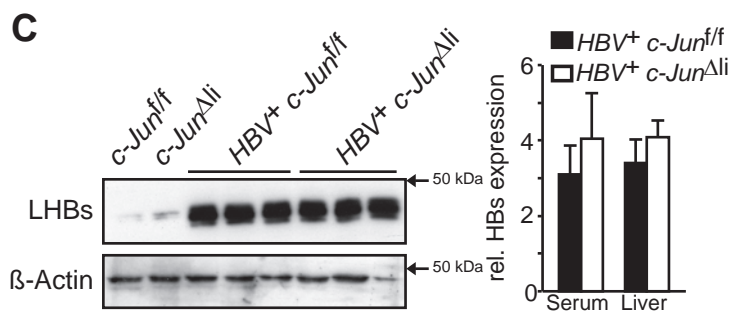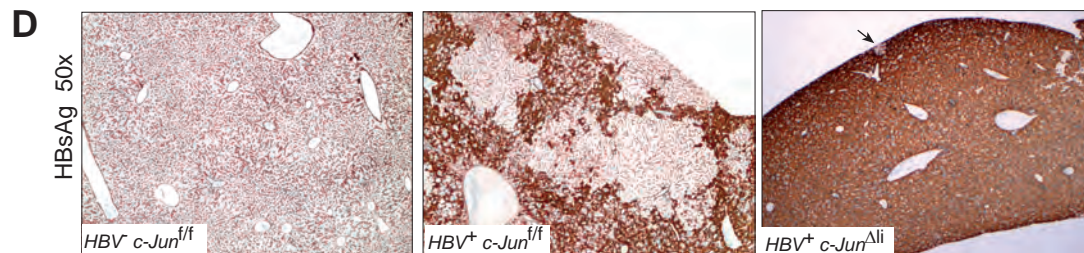

# Suppl. Fig. S2

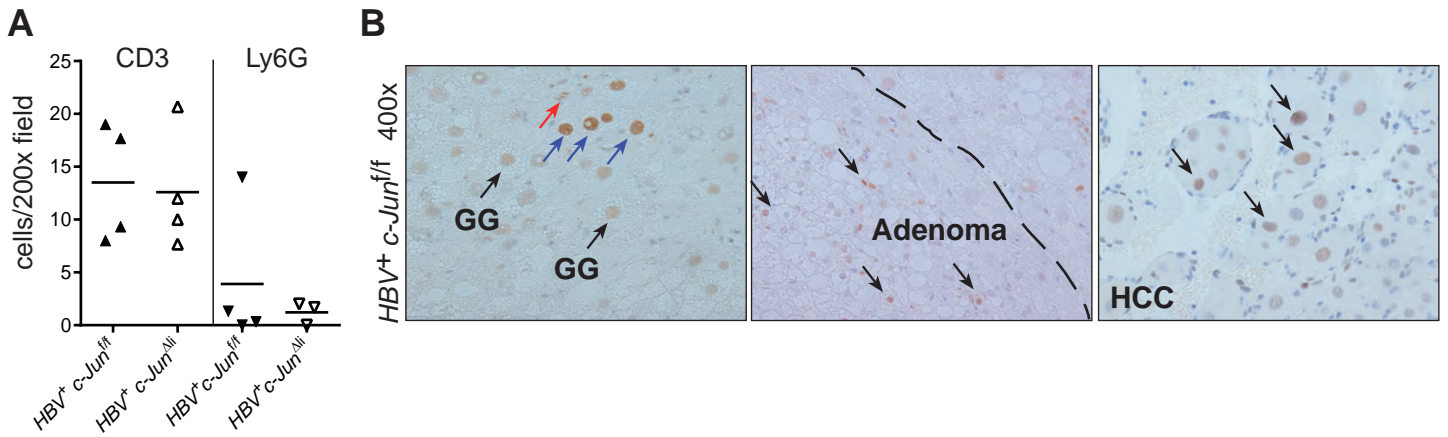

# Suppl. Fig. S3

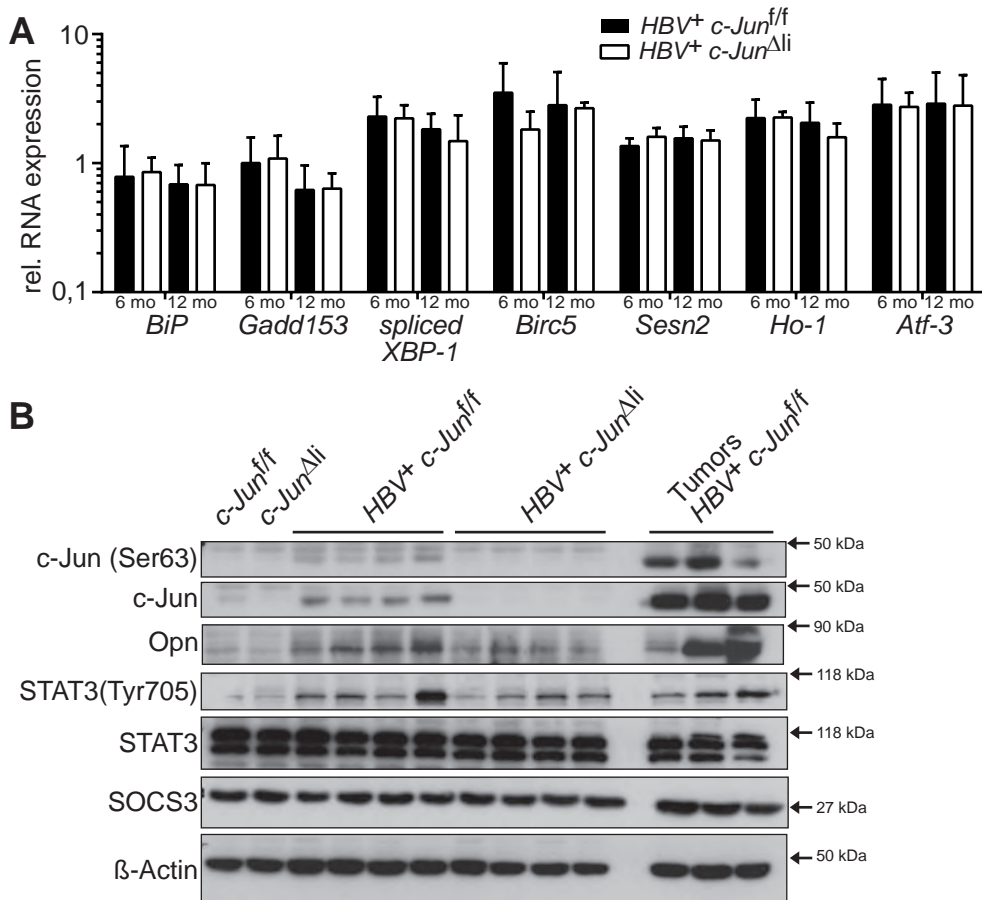

# Suppl. Fig. S4

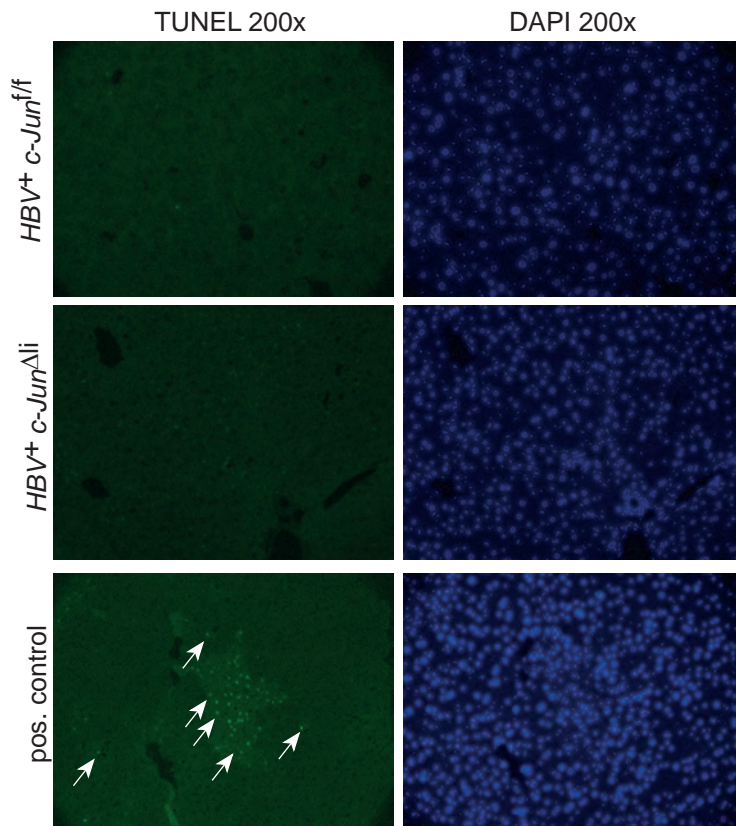

# Suppl. Fig. S5

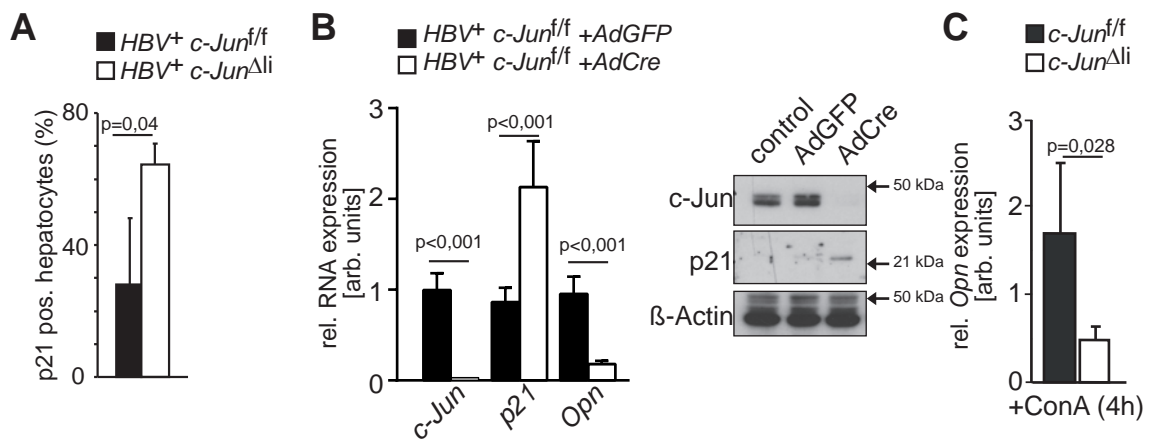

Supplement: cdd2015121x1.pdf [file cdd2015121x1.pdf]
